# Supplementary material for: Comparative Effectiveness of 2 Interventions to Increase Breast, Cervical, and Colorectal Cancer Screening Among Women in the Rural US: A Randomized Clinical Trial
Source: PubMed Central journal article supplement (PMC10148202; doi:10.1001/jamanetworkopen.2023.11004), 2023-04-28
Supplement: jamanetwopen-e2311004-s002.pdf [file jamanetwopen-e2311004-s002.pdf]

## Supplemental Online Content

Champion VL, Paskett ED, Stump TE, et al. Comparative effectiveness of 2 interventions to increase breast, cervical, and colorectal cancer screening among women in the rural US. *JAMA Netw Open*. 2023;6(4):e2311004.  
doi:10.1001/jamanetworkopen.2023.11004

**eTable 1.** Bivariate Analysis of Baseline Covariates and Screening Outcomes

**eTable 2.** Logistic Regression for All Cancer Screenings at 12 Months Postbaseline (n = 852)

**eTable 3.** Logistic Regression for Any Cancer Screening at 12 Months Postbaseline (n = 847)

**eAppendix.** Intervention Cost Methods

This supplemental material has been provided by the authors to give readers additional information about their work.

**eTable 1. Bivariate Analysis of Baseline Covariates and Screening Outcomes**

|                                                   | UTD for All cancer screenings               |                                     |                      | UTD for Any cancer screenings               |                                     |                      |
|---------------------------------------------------|---------------------------------------------|-------------------------------------|----------------------|---------------------------------------------|-------------------------------------|----------------------|
|                                                   | No record of test or outside window (N=769) | Received within 12mo window (N=194) | p value              | No record of test or outside window (N=616) | Received within 12mo window (N=347) | p value              |
| <b>Study design characteristics</b>               |                                             |                                     |                      |                                             |                                     |                      |
| Randomized arm:                                   |                                             |                                     | < 0.001 <sup>b</sup> |                                             |                                     | < 0.001 <sup>b</sup> |
| Usual care                                        | 174 (90.2%)                                 | 19 (9.8%)                           |                      | 145 (75.1%)                                 | 48 (24.9%)                          |                      |
| DVD                                               | 325 (85.1%)                                 | 57 (14.9%)                          |                      | 272 (71.2%)                                 | 110 (28.8%)                         |                      |
| DVD/Navigator                                     | 270 (69.6%)                                 | 118 (30.4%)                         |                      | 199 (51.3%)                                 | 189 (48.7%)                         |                      |
| Baseline Breast cancer screening status:          |                                             |                                     | 0.061 <sup>a</sup>   |                                             |                                     | < 0.001 <sup>a</sup> |
| Within screening guidelines (UTD)                 | 436 (77.7%)                                 | 125 (22.3%)                         |                      | 394 (70.2%)                                 | 167 (29.8%)                         |                      |
| Outside screening guidelines (not UTD)            | 333 (82.8%)                                 | 69 (17.2%)                          |                      | 222 (55.2%)                                 | 180 (44.8%)                         |                      |
| Baseline Colorectal cancer screening status:      |                                             |                                     | 0.015 <sup>a</sup>   |                                             |                                     | 0.111 <sup>a</sup>   |
| Within screening guidelines (UTD)                 | 225 (75.0%)                                 | 75 (25.0%)                          |                      | 203 (67.7%)                                 | 97 (32.3%)                          |                      |
| Outside screening guidelines (not UTD)            | 544 (82.1%)                                 | 119 (17.9%)                         |                      | 413 (62.3%)                                 | 250 (37.7%)                         |                      |
| Baseline Cervical cancer screening status:        |                                             |                                     | < 0.001 <sup>a</sup> |                                             |                                     | 0.278 <sup>a</sup>   |
| Within screening guidelines (UTD)                 | 279 (68.0%)                                 | 131 (32.0%)                         |                      | 254 (62.0%)                                 | 156 (38.0%)                         |                      |
| Outside screening guidelines (not UTD)            | 490 (88.6%)                                 | 63 (11.4%)                          |                      | 362 (65.5%)                                 | 191 (34.5%)                         |                      |
| Baseline screening status combinations (not UTD): |                                             |                                     | < 0.001 <sup>b</sup> |                                             |                                     | < 0.001 <sup>b</sup> |

|                                                                                                                                                                         |                                                   |                                           |                      |                                                   |                                           |                      |
|-------------------------------------------------------------------------------------------------------------------------------------------------------------------------|---------------------------------------------------|-------------------------------------------|----------------------|---------------------------------------------------|-------------------------------------------|----------------------|
| Breast, colorectal, and cervical                                                                                                                                        | 175 (94.1%)                                       | 11 (5.9%)                                 |                      | 111 (59.7%)                                       | 75 (40.3%)                                |                      |
| Breast and colorectal                                                                                                                                                   | 74 (83.1%)                                        | 15 (16.9%)                                |                      | 49 (55.1%)                                        | 40 (44.9%)                                |                      |
|                                                                                                                                                                         | UTD for All cancer screenings                     |                                           |                      | UTD for Any cancer screenings                     |                                           |                      |
|                                                                                                                                                                         | No record of test<br>or outside window<br>(N=769) | Received within<br>12mo window<br>(N=194) | p value              | No record of test<br>or outside<br>window (N=616) | Received within<br>12mo window<br>(N=347) | p value              |
| Breast and cervical                                                                                                                                                     | 58 (85.3%)                                        | 10 (14.7%)                                |                      | 36 (52.9%)                                        | 32 (47.1%)                                |                      |
| Colorectal and cervical                                                                                                                                                 | 116 (92.1%)                                       | 10 (7.9%)                                 |                      | 74 (58.7%)                                        | 52 (41.3%)                                |                      |
| Breast only                                                                                                                                                             | 26 (44.1%)                                        | 33 (55.9%)                                |                      | 26 (44.1%)                                        | 33 (55.9%)                                |                      |
| Colorectal only                                                                                                                                                         | 179 (68.3%)                                       | 83 (31.7%)                                |                      | 179 (68.3%)                                       | 83 (31.7%)                                |                      |
| Cervical only                                                                                                                                                           | 141 (81.5%)                                       | 32 (18.5%)                                |                      | 141 (81.5%)                                       | 32 (18.5%)                                |                      |
| Baseline screening status combinations (not<br>UTD) re-calculated for sensitivity analysis,<br>where all participants age 66+ coded as UTD<br>at baseline for cervical: |                                                   |                                           | < 0.001 <sup>b</sup> |                                                   |                                           | < 0.001 <sup>b</sup> |
| Mammography, CRC and PAP                                                                                                                                                | 141 (93.4%)                                       | 10 (6.6%)                                 |                      | 91 (60.3%)                                        | 60 (39.7%)                                |                      |
| Mammography and CRC                                                                                                                                                     | 108 (87.1%)                                       | 16 (12.9%)                                |                      | 69 (55.6%)                                        | 55 (44.4%)                                |                      |
| Mammography and PAP                                                                                                                                                     | 45 (83.3%)                                        | 9 (16.7%)                                 |                      | 27 (50.0%)                                        | 27 (50.0%)                                |                      |
| CRC and PAP                                                                                                                                                             | 84 (90.3%)                                        | 9 (9.7%)                                  |                      | 52 (55.9%)                                        | 41 (44.1%)                                |                      |
| Mammography only                                                                                                                                                        | 39 (53.4%)                                        | 34 (46.6%)                                |                      | 35 (47.9%)                                        | 38 (52.1%)                                |                      |
| CRC only                                                                                                                                                                | 211 (71.5%)                                       | 84 (28.5%)                                |                      | 201 (68.1%)                                       | 94 (31.9%)                                |                      |
| PAP only                                                                                                                                                                | 86 (75.4%)                                        | 28 (24.6%)                                |                      | 86 (75.4%)                                        | 28 (24.6%)                                |                      |
| N-Miss                                                                                                                                                                  | 55                                                | 4                                         |                      | 55                                                | 4                                         |                      |
| Medical record location confirmed vs not<br>confirmed at 12 months <sup>d</sup>                                                                                         |                                                   |                                           | < 0.001 <sup>a</sup> |                                                   |                                           | < 0.001 <sup>a</sup> |

|                                 |                                             |                                     |                    |                                             |                                     |                    |
|---------------------------------|---------------------------------------------|-------------------------------------|--------------------|---------------------------------------------|-------------------------------------|--------------------|
| Confirmed                       | 659 (78.1%)                                 | 185 (21.9%)                         |                    | 519 (61.5%)                                 | 325 (38.5%)                         |                    |
| Not confirmed                   | 110 (92.4%)                                 | 9 (7.6%)                            |                    | 97 (81.5%)                                  | 22 (18.5%)                          |                    |
|                                 | UTD for All cancer screenings               |                                     |                    | UTD for Any cancer screenings               |                                     |                    |
|                                 | No record of test or outside window (N=769) | Received within 12mo window (N=194) | p value            | No record of test or outside window (N=616) | Received within 12mo window (N=347) | p value            |
| State:                          |                                             |                                     | 0.622 <sup>a</sup> |                                             |                                     | 0.731 <sup>a</sup> |
| Indiana                         | 305 (80.7%)                                 | 73 (19.3%)                          |                    | 239 (63.2%)                                 | 139 (36.8%)                         |                    |
| Ohio                            | 464 (79.3%)                                 | 121 (20.7%)                         |                    | 377 (64.4%)                                 | 208 (35.6%)                         |                    |
| <b>Participant Demographics</b> |                                             |                                     |                    |                                             |                                     |                    |
| Age at consent                  |                                             |                                     | 0.004 <sup>c</sup> |                                             |                                     | 0.002 <sup>c</sup> |
| Mean (SD)                       | 58.9 (6.5)                                  | 57.4 (5.6)                          |                    | 59.0 (6.4)                                  | 57.7 (6.1)                          |                    |
| Median (Q1, Q3)                 | 58.0 (53.0, 63.0)                           | 57.0 (52.2, 61.8)                   |                    | 59.0 (53.0, 64.0)                           | 57.0 (52.0, 62.0)                   |                    |
| Range                           | 50.0 - 74.0                                 | 50.0 - 72.0                         |                    | 50.0 - 74.0                                 | 50.0 - 74.0                         |                    |
| Age-3 categories                |                                             |                                     | 0.013 <sup>b</sup> |                                             |                                     | 0.022 <sup>b</sup> |
| <65                             | 596 (78.0%)                                 | 168 (22.0%)                         |                    | 472 (61.8%)                                 | 292 (38.2%)                         |                    |
| 65-69                           | 118 (85.5%)                                 | 20 (14.5%)                          |                    | 99 (71.7%)                                  | 39 (28.3%)                          |                    |
| 70+                             | 55 (90.2%)                                  | 6 (9.8%)                            |                    | 45 (73.8%)                                  | 16 (26.2%)                          |                    |
| Age-4 categories                |                                             |                                     | 0.033 <sup>b</sup> |                                             |                                     | 0.012 <sup>b</sup> |
| 50-54                           | 253 (77.4%)                                 | 74 (22.6%)                          |                    | 199 (60.9%)                                 | 128 (39.1%)                         |                    |
| 55-59                           | 185 (77.1%)                                 | 55 (22.9%)                          |                    | 141 (58.8%)                                 | 99 (41.2%)                          |                    |
| 60-64                           | 158 (80.2%)                                 | 39 (19.8%)                          |                    | 132 (67.0%)                                 | 65 (33.0%)                          |                    |

|                                                                                                              | 173 (86.9%)                                       | 26 (13.1%)                                |                      | 144 (72.4%)                                       | 55 (27.6%)                                |                    |
|--------------------------------------------------------------------------------------------------------------|---------------------------------------------------|-------------------------------------------|----------------------|---------------------------------------------------|-------------------------------------------|--------------------|
| 65+                                                                                                          |                                                   |                                           |                      |                                                   |                                           |                    |
| Education                                                                                                    |                                                   |                                           | < 0.001 <sup>b</sup> |                                                   |                                           | 0.007 <sup>b</sup> |
|                                                                                                              | UTD for All cancer screenings                     |                                           |                      | UTD for Any cancer screenings                     |                                           |                    |
|                                                                                                              | No record of test<br>or outside window<br>(N=769) | Received within<br>12mo window<br>(N=194) | p value              | No record of test<br>or outside<br>window (N=616) | Received within<br>12mo window<br>(N=347) | p value            |
| HS/GED or less                                                                                               | 131 (87.3%)                                       | 19 (12.7%)                                |                      | 110 (73.3%)                                       | 40 (26.7%)                                |                    |
| Some college or Associate Degree                                                                             | 303 (82.6%)                                       | 64 (17.4%)                                |                      | 243 (66.2%)                                       | 124 (33.8%)                               |                    |
| BS/BA/AB/BSN                                                                                                 | 198 (79.2%)                                       | 52 (20.8%)                                |                      | 151 (60.4%)                                       | 99 (39.6%)                                |                    |
| MS or more                                                                                                   | 137 (69.9%)                                       | 59 (30.1%)                                |                      | 112 (57.1%)                                       | 84 (42.9%)                                |                    |
| Income                                                                                                       |                                                   |                                           | 0.005 <sup>b</sup>   |                                                   |                                           | 0.195 <sup>b</sup> |
| <\$40k                                                                                                       | 155 (86.6%)                                       | 24 (13.4%)                                |                      | 124 (69.3%)                                       | 55 (30.7%)                                |                    |
| \$40k - \$79,999                                                                                             | 289 (82.3%)                                       | 62 (17.7%)                                |                      | 228 (65.0%)                                       | 123 (35.0%)                               |                    |
| \$80k+                                                                                                       | 296 (74.7%)                                       | 100 (25.3%)                               |                      | 239 (60.4%)                                       | 157 (39.6%)                               |                    |
| Unknown                                                                                                      | 29 (78.4%)                                        | 8 (21.6%)                                 |                      | 25 (67.6%)                                        | 12 (32.4%)                                |                    |
| How would you describe your household's<br>financial situation right now?                                    |                                                   |                                           | 0.044 <sup>b</sup>   |                                                   |                                           | 0.016 <sup>b</sup> |
| After paying the bills, you still have enough<br>money for special things that you want.                     | 457 (77.7%)                                       | 131 (22.3%)                               |                      | 362 (61.6%)                                       | 226 (38.4%)                               |                    |
| You have enough money to pay the bills,<br>but little extra money to buy something special<br>that you want. | 218 (81.3%)                                       | 50 (18.7%)                                |                      | 173 (64.6%)                                       | 95 (35.4%)                                |                    |
| You have money to pay the bills only by<br>cutting back or are having difficulty paying the<br>bills.        | 88 (88.0%)                                        | 12 (12.0%)                                |                      | 76 (76.0%)                                        | 24 (24.0%)                                |                    |
| N-Miss                                                                                                       | 6                                                 | 1                                         |                      | 5                                                 | 2                                         |                    |
| Marital status                                                                                               |                                                   |                                           | 0.477 <sup>b</sup>   |                                                   |                                           | 0.257 <sup>b</sup> |

|                                                                     |                                                   |                                           |                      |                                                   |                                           |                      |
|---------------------------------------------------------------------|---------------------------------------------------|-------------------------------------------|----------------------|---------------------------------------------------|-------------------------------------------|----------------------|
| Married/living as married                                           | 589 (79.3%)                                       | 154 (20.7%)                               |                      | 475 (63.9%)                                       | 268 (36.1%)                               |                      |
| Divorced/Widowed/Separated                                          | 148 (80.4%)                                       | 36 (19.6%)                                |                      | 113 (61.4%)                                       | 71 (38.6%)                                |                      |
|                                                                     | UTD for All cancer screenings                     |                                           |                      | UTD for Any cancer screenings                     |                                           |                      |
|                                                                     | No record of test<br>or outside window<br>(N=769) | Received within<br>12mo window<br>(N=194) | p value              | No record of test<br>or outside<br>window (N=616) | Received within<br>12mo window<br>(N=347) | p value              |
| Never married                                                       | 30 (88.2%)                                        | 4 (11.8%)                                 |                      | 26 (76.5%)                                        | 8 (23.5%)                                 |                      |
| N-Miss                                                              | 2                                                 | 0                                         |                      | 2                                                 | 0                                         |                      |
| Insurance                                                           |                                                   |                                           | 0.004 <sup>b</sup>   |                                                   |                                           | 0.005 <sup>b</sup>   |
| No insurance                                                        | 45 (91.8%)                                        | 4 (8.2%)                                  |                      | 32 (65.3%)                                        | 17 (34.7%)                                |                      |
| Public only                                                         | 73 (85.9%)                                        | 12 (14.1%)                                |                      | 66 (77.6%)                                        | 19 (22.4%)                                |                      |
| Private only                                                        | 514 (76.8%)                                       | 155 (23.2%)                               |                      | 406 (60.7%)                                       | 263 (39.3%)                               |                      |
| Public and private                                                  | 136 (85.5%)                                       | 23 (14.5%)                                |                      | 111 (69.8%)                                       | 48 (30.2%)                                |                      |
| N-Miss                                                              | 1                                                 | 0                                         |                      | 1                                                 | 0                                         |                      |
| Race                                                                |                                                   |                                           | 0.808 <sup>a</sup>   |                                                   |                                           | 0.841 <sup>a</sup>   |
| Non-White                                                           | 21 (77.8%)                                        | 6 (22.2%)                                 |                      | 18 (66.7%)                                        | 9 (33.3%)                                 |                      |
| White                                                               | 748 (79.9%)                                       | 188 (20.1%)                               |                      | 598 (63.9%)                                       | 338 (36.1%)                               |                      |
| Do you consider yourself of Hispanic, Latino,<br>or Spanish origin? |                                                   |                                           | 0.100 <sup>a</sup>   |                                                   |                                           | 0.673 <sup>a</sup>   |
| No                                                                  | 766 (80.0%)                                       | 191 (20.0%)                               |                      | 613 (64.1%)                                       | 344 (35.9%)                               |                      |
| Yes                                                                 | 3 (50.0%)                                         | 3 (50.0%)                                 |                      | 3 (50.0%)                                         | 3 (50.0%)                                 |                      |
| Are you currently working for pay?                                  |                                                   |                                           | < 0.001 <sup>b</sup> |                                                   |                                           | < 0.001 <sup>b</sup> |
| No                                                                  | 267 (85.0%)                                       | 47 (15.0%)                                |                      | 229 (72.9%)                                       | 85 (27.1%)                                |                      |
| Yes - part time                                                     | 155 (83.3%)                                       | 31 (16.7%)                                |                      | 120 (64.5%)                                       | 66 (35.5%)                                |                      |

|                                                                         | 347 (74.9%)                                 |                                     | 116 (25.1%)        |                                             | 267 (57.7%)                         |                    | 196 (42.3%) |  |
|-------------------------------------------------------------------------|---------------------------------------------|-------------------------------------|--------------------|---------------------------------------------|-------------------------------------|--------------------|-------------|--|
|                                                                         | UTD for All cancer screenings               |                                     |                    |                                             | UTD for Any cancer screenings       |                    |             |  |
|                                                                         | No record of test or outside window (N=769) | Received within 12mo window (N=194) | p value            | No record of test or outside window (N=616) | Received within 12mo window (N=347) | p value            |             |  |
| Mother's education                                                      |                                             |                                     | 0.918 <sup>b</sup> |                                             |                                     | 0.935 <sup>b</sup> |             |  |
| HS/GED or less                                                          | 434 (80.2%)                                 | 107 (19.8%)                         |                    | 352 (65.1%)                                 | 189 (34.9%)                         |                    |             |  |
| Some college or AS                                                      | 176 (80.7%)                                 | 42 (19.3%)                          |                    | 137 (62.8%)                                 | 81 (37.2%)                          |                    |             |  |
| BS/BA/AB/BSN                                                            | 91 (78.4%)                                  | 25 (21.6%)                          |                    | 73 (62.9%)                                  | 43 (37.1%)                          |                    |             |  |
| MS or more                                                              | 48 (76.2%)                                  | 15 (23.8%)                          |                    | 39 (61.9%)                                  | 24 (38.1%)                          |                    |             |  |
| Unknown                                                                 | 20 (80.0%)                                  | 5 (20.0%)                           |                    | 15 (60.0%)                                  | 10 (40.0%)                          |                    |             |  |
| Where would you place yourself on this ladder (community)?              |                                             |                                     | 0.009 <sup>c</sup> |                                             |                                     | 0.848 <sup>c</sup> |             |  |
| Mean (SD)                                                               | 6.6 (1.7)                                   | 6.9 (1.6)                           |                    | 6.6 (1.7)                                   | 6.6 (1.6)                           |                    |             |  |
| Median (Q1, Q3)                                                         | 7.0 (6.0, 8.0)                              | 7.0 (6.0, 8.0)                      |                    | 7.0 (6.0, 8.0)                              | 7.0 (6.0, 8.0)                      |                    |             |  |
| Range                                                                   | 1.0 - 10.0                                  | 2.0 - 10.0                          |                    | 1.0 - 10.0                                  | 1.0 - 10.0                          |                    |             |  |
| N-Miss                                                                  | 11                                          | 4                                   |                    | 9                                           | 6                                   |                    |             |  |
| Where would you place yourself on this ladder (US)?                     |                                             |                                     | 0.010 <sup>c</sup> |                                             |                                     | 0.203 <sup>c</sup> |             |  |
| Mean (SD)                                                               | 6.1 (1.6)                                   | 6.4 (1.5)                           |                    | 6.1 (1.7)                                   | 6.2 (1.5)                           |                    |             |  |
| Median (Q1, Q3)                                                         | 6.0 (5.0, 7.0)                              | 7.0 (6.0, 7.0)                      |                    | 6.0 (5.0, 7.0)                              | 6.0 (5.0, 7.0)                      |                    |             |  |
| Range                                                                   | 1.0 - 10.0                                  | 2.0 - 10.0                          |                    | 1.0 - 10.0                                  | 2.0 - 10.0                          |                    |             |  |
| N-Miss                                                                  | 12                                          | 5                                   |                    | 9                                           | 8                                   |                    |             |  |
| U.S.-based percentile of block group Area Deprivation Index (ADI) score |                                             |                                     | 0,004 <sup>c</sup> |                                             |                                     | 0.031 <sup>c</sup> |             |  |

|                                                            | UTD for All cancer screenings               |                                     |                    | UTD for Any cancer screenings               |                                     |                    |
|------------------------------------------------------------|---------------------------------------------|-------------------------------------|--------------------|---------------------------------------------|-------------------------------------|--------------------|
|                                                            | No record of test or outside window (N=769) | Received within 12mo window (N=194) | p value            | No record of test or outside window (N=616) | Received within 12mo window (N=347) | p value            |
| Mean (SD)                                                  | 67.3 (15.9)                                 | 63.5 (15.8)                         |                    | 67.4 (16.1)                                 | 65.0 (15.6)                         |                    |
| Median (Q1, Q3)                                            | 68.0 (55.0, 80.0)                           | 63.0 (51.0, 76.0)                   |                    | 68.0 (55.0, 80.0)                           | 66.0 (53.0, 77.0)                   |                    |
| Range                                                      | 9.0 - 100.0                                 | 21.0 - 99.0                         |                    | 9.0 - 100.0                                 | 21.0 - 99.0                         |                    |
| N-Miss                                                     | 43                                          | 13                                  |                    | 32                                          | 24                                  |                    |
| Secondary RUCA Code—recoded, categorization B–2 categories |                                             |                                     | 0.065 <sup>b</sup> |                                             |                                     | 0.080 <sup>b</sup> |
| Urban and Large Rural City/Town                            | 507 (81.6%)                                 | 114 (18.4%)                         |                    | 410 (66.0%)                                 | 211 (34.0%)                         |                    |
| Small and Isolated Small Rural Town                        | 262 (76.6%)                                 | 80 (23.4%)                          |                    | 206 (60.2%)                                 | 136 (39.8%)                         |                    |
| U.S.-based quintile of Yost Index                          |                                             |                                     | 0.595 <sup>b</sup> |                                             |                                     | 0.410 <sup>b</sup> |
| 1 <sup>st</sup> quintile (Lowest SES)                      | 124 (83.2%)                                 | 25 (16.8%)                          |                    | 104 (69.8%)                                 | 45 (30.2%)                          |                    |
| 2 <sup>nd</sup> quintile                                   | 264 (78.8%)                                 | 71 (21.2%)                          |                    | 205 (61.2%)                                 | 130 (38.8%)                         |                    |
| 3 <sup>rd</sup> quintile                                   | 240 (80.3%)                                 | 59 (19.7%)                          |                    | 192 (64.2%)                                 | 107 (35.8%)                         |                    |
| 4 <sup>th</sup> quintile                                   | 71 (75.5%)                                  | 23 (24.5%)                          |                    | 62 (66.0%)                                  | 32 (34.0%)                          |                    |
| 5 <sup>th</sup> quintile (Highest SES)                     | 1 (100.0%)                                  | 0 (0.0%)                            |                    | 1 (100.0%)                                  | 0 (0.0%)                            |                    |
| N-Miss                                                     | 69                                          | 16                                  |                    | 52                                          | 33                                  |                    |
| <b>Health behaviors and characteristics</b>                |                                             |                                     |                    |                                             |                                     |                    |
| Smoking status                                             |                                             |                                     | 0.061 <sup>b</sup> |                                             |                                     | 0.176 <sup>b</sup> |
| Never                                                      | 504 (79.5%)                                 | 130 (20.5%)                         |                    | 402 (63.4%)                                 | 232 (36.6%)                         |                    |
| Former                                                     | 196 (80.3%)                                 | 48 (19.7%)                          |                    | 158 (64.8%)                                 | 86 (35.2%)                          |                    |



|                                        | UTD for All cancer screenings               |                                     |                    | UTD for Any cancer screenings               |                                     |                    |
|----------------------------------------|---------------------------------------------|-------------------------------------|--------------------|---------------------------------------------|-------------------------------------|--------------------|
|                                        | No record of test or outside window (N=769) | Received within 12mo window (N=194) | p value            | No record of test or outside window (N=616) | Received within 12mo window (N=347) | p value            |
| Current                                | 51 (89.5%)                                  | 6 (10.5%)                           |                    | 42 (73.7%)                                  | 15 (26.3%)                          |                    |
| Unknown                                | 18 (64.3%)                                  | 10 (35.7%)                          |                    | 14 (50.0%)                                  | 14 (50.0%)                          |                    |
| Baseline BMI                           |                                             |                                     | 0.273 <sup>c</sup> |                                             |                                     | 0.363 <sup>c</sup> |
| Mean (SD)                              | 31.5 (7.7)                                  | 30.8 (7.1)                          |                    | 31.6 (7.7)                                  | 31.0 (7.4)                          |                    |
| Median (Q1, Q3)                        | 30.3 (26.3, 36.4)                           | 29.0 (25.8, 35.4)                   |                    | 30.2 (26.4, 36.3)                           | 29.6 (25.7, 35.8)                   |                    |
| Range                                  | 18.5 - 69.3                                 | 19.9 - 60.1                         |                    | 18.8 - 69.3                                 | 18.5 - 60.1                         |                    |
| N-Miss                                 | 268                                         | 50                                  |                    | 212                                         | 106                                 |                    |
| Baseline BMI categories                |                                             |                                     | 0.017 <sup>b</sup> |                                             |                                     | 0.331 <sup>b</sup> |
| Normal                                 | 98 (77.8%)                                  | 28 (22.2%)                          |                    | 76 (60.3%)                                  | 50 (39.7%)                          |                    |
| Overweight                             | 139 (72.8%)                                 | 52 (27.2%)                          |                    | 114 (59.7%)                                 | 77 (40.3%)                          |                    |
| Obese                                  | 264 (80.5%)                                 | 64 (19.5%)                          |                    | 214 (65.2%)                                 | 114 (34.8%)                         |                    |
| Unknown                                | 268 (84.3%)                                 | 50 (15.7%)                          |                    | 212 (66.7%)                                 | 106 (33.3%)                         |                    |
| <b>Prior cancer screening behavior</b> |                                             |                                     |                    |                                             |                                     |                    |
| Have you ever had a mammogram?         |                                             |                                     | 0.001 <sup>a</sup> |                                             |                                     | 0.014 <sup>a</sup> |
| No                                     | 32 (100.0%)                                 | 0 (0.0%)                            |                    | 27 (84.4%)                                  | 5 (15.6%)                           |                    |
| Yes                                    | 737 (79.2%)                                 | 194 (20.8%)                         |                    | 589 (63.3%)                                 | 342 (36.7%)                         |                    |
| Have you ever had a Pap test?          |                                             |                                     | 0.589 <sup>a</sup> |                                             |                                     | 1.000 <sup>a</sup> |
| No                                     | 4 (100.0%)                                  | 0 (0.0%)                            |                    | 3 (75.0%)                                   | 1 (25.0%)                           |                    |
| Yes                                    | 764 (79.7%)                                 | 194 (20.3%)                         |                    | 612 (63.9%)                                 | 346 (36.1%)                         |                    |

|                                                                                                | UTD for All cancer screenings               |                                     |                    | UTD for Any cancer screenings               |                                     |                    |
|------------------------------------------------------------------------------------------------|---------------------------------------------|-------------------------------------|--------------------|---------------------------------------------|-------------------------------------|--------------------|
|                                                                                                | No record of test or outside window (N=769) | Received within 12mo window (N=194) | p value            | No record of test or outside window (N=616) | Received within 12mo window (N=347) | p value            |
| N-Miss                                                                                         | 1                                           | 0                                   |                    | 1                                           | 0                                   |                    |
| Have you ever done a fecal occult blood test or stool blood test or FIT using a home test kit? |                                             |                                     | 0.553 <sup>a</sup> |                                             |                                     | 0.098 <sup>a</sup> |
| No                                                                                             | 600 (79.4%)                                 | 156 (20.6%)                         |                    | 474 (62.7%)                                 | 282 (37.3%)                         |                    |
| Yes                                                                                            | 164 (81.6%)                                 | 37 (18.4%)                          |                    | 139 (69.2%)                                 | 62 (30.8%)                          |                    |
| N-Miss                                                                                         | 5                                           | 1                                   |                    | 3                                           | 3                                   |                    |
| Have you ever had a colonoscopy?                                                               |                                             |                                     | 0.053 <sup>a</sup> |                                             |                                     | 0.946 <sup>a</sup> |
| No                                                                                             | 418 (82.3%)                                 | 90 (17.7%)                          |                    | 324 (63.8%)                                 | 184 (36.2%)                         |                    |
| Yes                                                                                            | 351 (77.1%)                                 | 104 (22.9%)                         |                    | 292 (64.2%)                                 | 163 (35.8%)                         |                    |
| Have you ever done a FOBT or had a colonoscopy?                                                |                                             |                                     |                    |                                             |                                     |                    |
| No                                                                                             | 344 (82.3%)                                 | 74 (17.7%)                          |                    | 261 (62.4%)                                 | 157 (37.6%)                         |                    |
| Yes                                                                                            | 425 (78.0%)                                 | 120 (22.0%)                         |                    | 355 (65.1%)                                 | 190 (34.9%)                         |                    |
| Unknown                                                                                        | 0 (0%)                                      | 0 (0%)                              |                    | 0 (0%)                                      | 0 (0%)                              |                    |
| <b>Have you ever had a mammogram, FOBT, colonoscopy or PAP test?</b>                           |                                             |                                     |                    |                                             |                                     |                    |
| No                                                                                             | 1 (100.0%)                                  | 0 (0.0%)                            |                    | 1 (100.0%)                                  | 0 (0.0%)                            |                    |
| Yes                                                                                            | 768 (79.8%)                                 | 194 (20.2%)                         |                    | 615 (63.9%)                                 | 347 (36.1%)                         |                    |
| Unknown                                                                                        | 0 (0%)                                      | 0 (0%)                              |                    | 0 (0%)                                      | 0 (0%)                              |                    |
| <b>Health care encounter experiences</b>                                                       |                                             |                                     |                    |                                             |                                     |                    |
|                                                                                                | UTD for All cancer screenings               |                                     |                    | UTD for Any cancer screenings               |                                     |                    |

|                                                                                       | No record of test or outside window (N=769) | Received within 12mo window (N=194) | p value            | No record of test or outside window (N=616) | Received within 12mo window (N=347) | p value            |
|---------------------------------------------------------------------------------------|---------------------------------------------|-------------------------------------|--------------------|---------------------------------------------|-------------------------------------|--------------------|
| Has a doctor or health care provider ever suggested that you have a mammogram?        |                                             |                                     | 0.125 <sup>a</sup> |                                             |                                     | 0.582 <sup>a</sup> |
| No                                                                                    | 30 (90.9%)                                  | 3 (9.1%)                            |                    | 23 (69.7%)                                  | 10 (30.3%)                          |                    |
| Yes                                                                                   | 730 (79.6%)                                 | 187 (20.4%)                         |                    | 586 (63.9%)                                 | 331 (36.1%)                         |                    |
| N-Miss                                                                                | 9                                           | 4                                   |                    | 7                                           | 6                                   |                    |
| Has a doctor ever suggested that you have a Pap test?                                 |                                             |                                     | 0.015 <sup>a</sup> |                                             |                                     | 0.034 <sup>a</sup> |
| No                                                                                    | 96 (88.9%)                                  | 12 (11.1%)                          |                    | 79 (73.1%)                                  | 29 (26.9%)                          |                    |
| Yes                                                                                   | 662 (78.8%)                                 | 178 (21.2%)                         |                    | 527 (62.7%)                                 | 313 (37.3%)                         |                    |
| N-Miss                                                                                | 11                                          | 4                                   |                    | 10                                          | 5                                   |                    |
| Has a doctor or health care provider ever recommended that you do a stool blood test? |                                             |                                     | 0.727 <sup>a</sup> |                                             |                                     | 0.885 <sup>a</sup> |
| No                                                                                    | 508 (80.5%)                                 | 123 (19.5%)                         |                    | 407 (64.5%)                                 | 224 (35.5%)                         |                    |
| Yes                                                                                   | 244 (79.5%)                                 | 63 (20.5%)                          |                    | 196 (63.8%)                                 | 111 (36.2%)                         |                    |
| N-Miss                                                                                | 17                                          | 8                                   |                    | 13                                          | 12                                  |                    |
| Has a doctor ever recommended you have a colonoscopy?                                 |                                             |                                     | 0.073 <sup>a</sup> |                                             |                                     | 0.581 <sup>a</sup> |
| No                                                                                    | 193 (83.9%)                                 | 37 (16.1%)                          |                    | 143 (62.2%)                                 | 87 (37.8%)                          |                    |
| Yes                                                                                   | 558 (78.4%)                                 | 154 (21.6%)                         |                    | 458 (64.3%)                                 | 254 (35.7%)                         |                    |
| N-Miss                                                                                | 18                                          | 3                                   |                    | 15                                          | 6                                   |                    |
| Has a doctor ever recommended you have a FOBT or colonoscopy?                         |                                             |                                     | 0.248 <sup>b</sup> |                                             |                                     | 0.418 <sup>b</sup> |
|                                                                                       | UTD for All cancer screenings               |                                     |                    | UTD for Any cancer screenings               |                                     |                    |

|                                                                                                                  | No record of test or outside window (N=769) | Received within 12mo window (N=194) | p value            | No record of test or outside window (N=616) | Received within 12mo window (N=347) | p value            |
|------------------------------------------------------------------------------------------------------------------|---------------------------------------------|-------------------------------------|--------------------|---------------------------------------------|-------------------------------------|--------------------|
| No                                                                                                               | 160 (83.3%)                                 | 32 (16.7%)                          |                    | 116 (60.4%)                                 | 76 (39.6%)                          |                    |
| Yes                                                                                                              | 603 (79.1%)                                 | 159 (20.9%)                         |                    | 495 (65.0%)                                 | 267 (35.0%)                         |                    |
| Unknown                                                                                                          | 6 (66.7%)                                   | 3 (33.3%)                           |                    | 5 (55.6%)                                   | 4 (44.4%)                           |                    |
| Has a doctor ever recommended you have a mammogram, FOBT, colonoscopy or PAP test?                               |                                             |                                     | 0.055 <sup>b</sup> |                                             |                                     | 0.148 <sup>b</sup> |
| No                                                                                                               | 15 (100.0%)                                 | 0 (0.0%)                            |                    | 13 (86.7%)                                  | 2 (13.3%)                           |                    |
| Yes                                                                                                              | 748 (79.7%)                                 | 191 (20.3%)                         |                    | 598 (63.7%)                                 | 341 (36.3%)                         |                    |
| Unknown                                                                                                          | 6 (66.7%)                                   | 3 (33.3%)                           |                    | 5 (55.6%)                                   | 4 (44.4%)                           |                    |
| Have you received any reminders from your health care facility to tell you that it was time to have a mammogram? |                                             |                                     | 0.094 <sup>a</sup> |                                             |                                     | 0.780 <sup>a</sup> |
| No                                                                                                               | 305 (82.7%)                                 | 64 (17.3%)                          |                    | 238 (64.5%)                                 | 131 (35.5%)                         |                    |
| Yes                                                                                                              | 433 (78.0%)                                 | 122 (22.0%)                         |                    | 352 (63.4%)                                 | 203 (36.6%)                         |                    |
| N-Miss                                                                                                           | 31                                          | 8                                   |                    | 26                                          | 13                                  |                    |
| Have you received any reminders from your health care facility to tell you that it was time to have a Pap test?  |                                             |                                     | 0.024 <sup>a</sup> |                                             |                                     | 0.175 <sup>a</sup> |
| No                                                                                                               | 539 (81.7%)                                 | 121 (18.3%)                         |                    | 429 (65.0%)                                 | 231 (35.0%)                         |                    |
| Yes                                                                                                              | 199 (74.8%)                                 | 67 (25.2%)                          |                    | 160 (60.2%)                                 | 106 (39.8%)                         |                    |
| N-Miss                                                                                                           | 31                                          | 6                                   |                    | 27                                          | 10                                  |                    |

|                                                                                                                            | UTD for All cancer screenings               |                                     |                    | UTD for Any cancer screenings               |                                     |                    |
|----------------------------------------------------------------------------------------------------------------------------|---------------------------------------------|-------------------------------------|--------------------|---------------------------------------------|-------------------------------------|--------------------|
|                                                                                                                            | No record of test or outside window (N=769) | Received within 12mo window (N=194) | p value            | No record of test or outside window (N=616) | Received within 12mo window (N=347) | p value            |
| Have you received any reminders from your health care facility to tell you that it was time to have a stool blood test?    |                                             |                                     | 1.000 <sup>a</sup> |                                             |                                     | 1.000 <sup>a</sup> |
| No                                                                                                                         | 707 (79.7%)                                 | 180 (20.3%)                         |                    | 567 (63.9%)                                 | 320 (36.1%)                         |                    |
| Yes                                                                                                                        | 43 (79.6%)                                  | 11 (20.4%)                          |                    | 35 (64.8%)                                  | 19 (35.2%)                          |                    |
| N-Miss                                                                                                                     | 19                                          | 3                                   |                    | 14                                          | 8                                   |                    |
| Have you received any reminders from your health care facility to tell you that it was time to have a colonoscopy?         |                                             |                                     | 0.017 <sup>a</sup> |                                             |                                     | 0.014 <sup>a</sup> |
| No                                                                                                                         | 643 (81.1%)                                 | 150 (18.9%)                         |                    | 519 (65.4%)                                 | 274 (34.6%)                         |                    |
| Yes                                                                                                                        | 103 (72.0%)                                 | 40 (28.0%)                          |                    | 78 (54.5%)                                  | 65 (45.5%)                          |                    |
| N-Miss                                                                                                                     | 23                                          | 4                                   |                    | 19                                          | 8                                   |                    |
| Have you received any reminders from your health care facility to tell you that it was time to have a FOBT or colonoscopy? |                                             |                                     | 0.047 <sup>b</sup> |                                             |                                     | 0.062 <sup>b</sup> |
| No                                                                                                                         | 635 (81.3%)                                 | 146 (18.7%)                         |                    | 513 (65.7%)                                 | 268 (34.3%)                         |                    |
| Yes                                                                                                                        | 121 (72.9%)                                 | 45 (27.1%)                          |                    | 94 (56.6%)                                  | 72 (43.4%)                          |                    |
| Unknown                                                                                                                    | 13 (81.2%)                                  | 3 (18.8%)                           |                    | 9 (56.2%)                                   | 7 (43.8%)                           |                    |
| Have you received any reminders to have a mammogram, FOBT, colonoscopy or PAP test?                                        |                                             |                                     | 0.049 <sup>b</sup> |                                             |                                     | 0.487 <sup>b</sup> |
| No                                                                                                                         | 287 (83.9%)                                 | 55 (16.1%)                          |                    | 226 (66.1%)                                 | 116 (33.9%)                         |                    |
| Yes                                                                                                                        | 474 (77.7%)                                 | 136 (22.3%)                         |                    | 384 (63.0%)                                 | 226 (37.0%)                         |                    |

|                                                                        | UTD for All cancer screenings               |                                     |                      | UTD for Any cancer screenings               |                                     |                      |
|------------------------------------------------------------------------|---------------------------------------------|-------------------------------------|----------------------|---------------------------------------------|-------------------------------------|----------------------|
|                                                                        | No record of test or outside window (N=769) | Received within 12mo window (N=194) | p value              | No record of test or outside window (N=616) | Received within 12mo window (N=347) | p value              |
| Unknown                                                                | 8 (72.7%)                                   | 3 (27.3%)                           |                      | 6 (54.5%)                                   | 5 (45.5%)                           |                      |
| <b>Cancer screening contemplation</b>                                  |                                             |                                     |                      |                                             |                                     |                      |
| Are you planning to have a mammogram in the next 6 months?             |                                             |                                     | 0.004 <sup>a</sup>   |                                             |                                     | < 0.001 <sup>a</sup> |
| No                                                                     | 363 (83.3%)                                 | 73 (16.7%)                          |                      | 305 (70.0%)                                 | 131 (30.0%)                         |                      |
| Yes                                                                    | 335 (75.3%)                                 | 110 (24.7%)                         |                      | 262 (58.9%)                                 | 183 (41.1%)                         |                      |
| N-Miss                                                                 | 71                                          | 11                                  |                      | 49                                          | 33                                  |                      |
| Are you planning to have a Pap test in the next 6 months?              |                                             |                                     | < 0.001 <sup>a</sup> |                                             |                                     | < 0.001 <sup>a</sup> |
| No                                                                     | 531 (82.6%)                                 | 112 (17.4%)                         |                      | 436 (67.8%)                                 | 207 (32.2%)                         |                      |
| Yes                                                                    | 170 (72.0%)                                 | 66 (28.0%)                          |                      | 129 (54.7%)                                 | 107 (45.3%)                         |                      |
| N-Miss                                                                 | 68                                          | 16                                  |                      | 51                                          | 33                                  |                      |
| Are you planning to have a home stool blood test in the next 6 months? |                                             |                                     | 0.201 <sup>a</sup>   |                                             |                                     | 0.283 <sup>a</sup>   |
| No                                                                     | 592 (80.2%)                                 | 146 (19.8%)                         |                      | 479 (64.9%)                                 | 259 (35.1%)                         |                      |
| Yes                                                                    | 63 (74.1%)                                  | 22 (25.9%)                          |                      | 50 (58.8%)                                  | 35 (41.2%)                          |                      |
| N-Miss                                                                 | 114                                         | 26                                  |                      | 87                                          | 53                                  |                      |
| Are you planning to have a colonoscopy in the next 6 months?           |                                             |                                     | 0.001 <sup>a</sup>   |                                             |                                     | 0.004 <sup>a</sup>   |
| No                                                                     | 589 (81.8%)                                 | 131 (18.2%)                         |                      | 479 (66.5%)                                 | 241 (33.5%)                         |                      |
| Yes                                                                    | 82 (68.3%)                                  | 38 (31.7%)                          |                      | 63 (52.5%)                                  | 57 (47.5%)                          |                      |
| N-Miss                                                                 | 98                                          | 25                                  |                      | 74                                          | 49                                  |                      |

|                                                                                           | UTD for All cancer screenings               |                                     |                      | UTD for Any cancer screenings               |                                     |                      |
|-------------------------------------------------------------------------------------------|---------------------------------------------|-------------------------------------|----------------------|---------------------------------------------|-------------------------------------|----------------------|
|                                                                                           | No record of test or outside window (N=769) | Received within 12mo window (N=194) | p value              | No record of test or outside window (N=616) | Received within 12mo window (N=347) | p value              |
| Are you planning to have a FOBT or colonoscopy in the next 6 months?                      |                                             |                                     | 0.002 <sup>b</sup>   |                                             |                                     | 0.003 <sup>b</sup>   |
| No                                                                                        | 578 (82.3%)                                 | 124 (17.7%)                         |                      | 471 (67.1%)                                 | 231 (32.9%)                         |                      |
| Yes                                                                                       | 136 (70.5%)                                 | 57 (29.5%)                          |                      | 104 (53.9%)                                 | 89 (46.1%)                          |                      |
| Unknown                                                                                   | 55 (80.9%)                                  | 13 (19.1%)                          |                      | 41 (60.3%)                                  | 27 (39.7%)                          |                      |
| Are you planning to have a mammogram, FOBT, colonoscopy or PAP test in the next 6 months? |                                             |                                     | < 0.001 <sup>b</sup> |                                             |                                     | < 0.001 <sup>b</sup> |
| No                                                                                        | 323 (86.1%)                                 | 52 (13.9%)                          |                      | 270 (72.0%)                                 | 105 (28.0%)                         |                      |
| Yes                                                                                       | 433 (75.7%)                                 | 139 (24.3%)                         |                      | 336 (58.7%)                                 | 236 (41.3%)                         |                      |
| Unknown                                                                                   | 13 (81.2%)                                  | 3 (18.8%)                           |                      | 10 (62.5%)                                  | 6 (37.5%)                           |                      |
| <b>Cancer screening beliefs and knowledge</b>                                             |                                             |                                     |                      |                                             |                                     |                      |
| Perceived barriers to mammography screening score (range: 9-45)                           |                                             |                                     | 0.095 <sup>c</sup>   |                                             |                                     | 0.183 <sup>c</sup>   |
| Mean (SD)                                                                                 | 18.4 (5.3)                                  | 17.7 (5.1)                          |                      | 18.1 (5.3)                                  | 18.6 (5.2)                          |                      |
| Median (Q1, Q3)                                                                           | 18.0 (14.0, 22.0)                           | 18.0 (13.0, 21.0)                   |                      | 18.0 (14.0, 21.0)                           | 19.0 (14.5, 22.0)                   |                      |
| Range                                                                                     | 9.0 - 34.0                                  | 9.0 - 31.0                          |                      | 9.0 - 34.0                                  | 9.0 - 33.0                          |                      |
| N-Miss                                                                                    | 5                                           | 3                                   |                      | 4                                           | 4                                   |                      |
| Perceived barriers to Pap screening score (range:8-40)                                    |                                             |                                     | 0.095 <sup>c</sup>   |                                             |                                     | 0.657 <sup>c</sup>   |
| Mean (SD)                                                                                 | 15.9 (5.0)                                  | 15.3 (4.9)                          |                      | 15.7 (5.0)                                  | 15.9 (4.9)                          |                      |
| Median (Q1, Q3)                                                                           | 16.0 (12.0, 19.0)                           | 15.0 (11.0, 19.0)                   |                      | 16.0 (12.0, 19.0)                           | 16.0 (12.0, 20.0)                   |                      |

|                                                                  | UTD for All cancer screenings               |                                     |                    | UTD for Any cancer screenings               |                                     |                    |
|------------------------------------------------------------------|---------------------------------------------|-------------------------------------|--------------------|---------------------------------------------|-------------------------------------|--------------------|
|                                                                  | No record of test or outside window (N=769) | Received within 12mo window (N=194) | p value            | No record of test or outside window (N=616) | Received within 12mo window (N=347) | p value            |
| Range                                                            | 8.0 - 30.0                                  | 8.0 - 28.0                          |                    | 8.0 - 30.0                                  | 8.0 - 28.0                          |                    |
| N-Miss                                                           | 7                                           | 3                                   |                    | 6                                           | 4                                   |                    |
| Perceived barriers to FOBT screening score (range: 7-35)         |                                             |                                     | 0.538 <sup>c</sup> |                                             |                                     | 0.012 <sup>c</sup> |
| Mean (SD)                                                        | 14.7 (4.8)                                  | 14.9 (4.9)                          |                    | 14.4 (4.9)                                  | 15.3 (4.7)                          |                    |
| Median (Q1, Q3)                                                  | 15.0 (11.0, 18.0)                           | 15.0 (10.5, 19.0)                   |                    | 14.0 (10.0, 18.0)                           | 16.0 (11.5, 19.0)                   |                    |
| Range                                                            | 7.0 - 31.0                                  | 7.0 - 26.0                          |                    | 7.0 - 31.0                                  | 7.0 - 26.0                          |                    |
| N-Miss                                                           | 6                                           | 3                                   |                    | 5                                           | 4                                   |                    |
| Perceived barriers to colonoscopy screening score (range: 10-50) |                                             |                                     | 0.131 <sup>c</sup> |                                             |                                     | 0.069 <sup>c</sup> |
| Mean (SD)                                                        | 22.2 (6.6)                                  | 21.4 (6.3)                          |                    | 21.8 (6.6)                                  | 22.6 (6.3)                          |                    |
| Median (Q1, Q3)                                                  | 23.0 (17.0, 27.0)                           | 22.0 (16.0, 26.0)                   |                    | 22.0 (16.0, 27.0)                           | 23.0 (18.0, 27.0)                   |                    |
| Range                                                            | 10.0 - 41.0                                 | 10.0 - 35.0                         |                    | 10.0 - 41.0                                 | 10.0 - 39.0                         |                    |
| N-Miss                                                           | 5                                           | 3                                   |                    | 4                                           | 4                                   |                    |
| Perceived barriers 1st principal component                       |                                             |                                     | 0.209 <sup>c</sup> |                                             |                                     | 0.085 <sup>c</sup> |
| Mean (SD)                                                        | 0.0 (1.0)                                   | -0.1 (1.0)                          |                    | -0.0 (1.0)                                  | 0.1 (1.0)                           |                    |
| Median (Q1, Q3)                                                  | 0.1 (-0.8, 0.7)                             | -0.0 (-0.9, 0.7)                    |                    | -0.0 (-0.9, 0.7)                            | 0.2 (-0.7, 0.8)                     |                    |
| Range                                                            | -2.0 - 3.3                                  | -2.0 - 2.4                          |                    | -2.0 - 3.3                                  | -2.0 - 2.6                          |                    |
| N-Miss                                                           | 7                                           | 3                                   |                    | 6                                           | 4                                   |                    |
| Perceived benefit of screening score (range: 3-15)               |                                             |                                     | 0.590 <sup>c</sup> |                                             |                                     | 0.310 <sup>c</sup> |



|                                                              | UTD for All cancer screenings               |                                     |                      | UTD for Any cancer screenings               |                                     |                    |
|--------------------------------------------------------------|---------------------------------------------|-------------------------------------|----------------------|---------------------------------------------|-------------------------------------|--------------------|
|                                                              | No record of test or outside window (N=769) | Received within 12mo window (N=194) | p value              | No record of test or outside window (N=616) | Received within 12mo window (N=347) | p value            |
| Mean (SD)                                                    | 11.4 (2.6)                                  | 11.5 (2.5)                          |                      | 11.5 (2.7)                                  | 11.3 (2.5)                          |                    |
| Median (Q1, Q3)                                              | 12.0 (10.0, 13.0)                           | 12.0 (10.0, 12.0)                   |                      | 12.0 (10.0, 13.0)                           | 12.0 (10.0, 12.0)                   |                    |
| Range                                                        | 3.0 - 15.0                                  | 3.0 - 15.0                          |                      | 3.0 - 15.0                                  | 3.0 - 15.0                          |                    |
| N-Miss                                                       | 5                                           | 3                                   |                      | 4                                           | 4                                   |                    |
| Perceived cancer risk score (range: 3-9)                     |                                             |                                     | 0.607 <sup>c</sup>   |                                             |                                     | 0.913 <sup>c</sup> |
| Mean (SD)                                                    | 5.4 (1.2)                                   | 5.5 (1.3)                           |                      | 5.4 (1.2)                                   | 5.4 (1.2)                           |                    |
| Median (Q1, Q3)                                              | 6.0 (5.0, 6.0)                              | 6.0 (5.0, 6.0)                      |                      | 6.0 (5.0, 6.0)                              | 6.0 (5.0, 6.0)                      |                    |
| Range                                                        | 3.0 - 9.0                                   | 3.0 - 9.0                           |                      | 3.0 - 9.0                                   | 3.0 - 9.0                           |                    |
| N-Miss                                                       | 6                                           | 4                                   |                      | 5                                           | 5                                   |                    |
| Perceived cancer screening self-efficacy score (range: 4-20) |                                             |                                     | < 0.001 <sup>c</sup> |                                             |                                     | 0.126 <sup>c</sup> |
| Mean (SD)                                                    | 17.5 (3.0)                                  | 18.4 (2.2)                          |                      | 17.6 (2.9)                                  | 17.9 (2.7)                          |                    |
| Median (Q1, Q3)                                              | 18.0 (16.0, 20.0)                           | 20.0 (17.0, 20.0)                   |                      | 19.0 (16.0, 20.0)                           | 19.0 (16.0, 20.0)                   |                    |
| Range                                                        | 4.0 - 20.0                                  | 10.0 - 20.0                         |                      | 4.0 - 20.0                                  | 4.0 - 20.0                          |                    |
| N-Miss                                                       | 6                                           | 3                                   |                      | 5                                           | 4                                   |                    |
| Breast cancer knowledge score (range: 0-5)                   |                                             |                                     | < 0.001 <sup>c</sup> |                                             |                                     | 0.245 <sup>c</sup> |
| Mean (SD)                                                    | 3.6 (1.1)                                   | 4.0 (1.0)                           |                      | 3.7 (1.1)                                   | 3.8 (1.0)                           |                    |
| Median (Q1, Q3)                                              | 4.0 (3.0, 5.0)                              | 4.0 (3.0, 5.0)                      |                      | 4.0 (3.0, 5.0)                              | 4.0 (3.0, 5.0)                      |                    |
| Range                                                        | 0.0 - 5.0                                   | 0.0 - 5.0                           |                      | 0.0 - 5.0                                   | 0.0 - 5.0                           |                    |
|                                                              | UTD for All cancer screenings               |                                     |                      | UTD for Any cancer screenings               |                                     |                    |

|                                              | No record of test<br>or outside window<br>(N=769) | Received within<br>12mo window<br>(N=194) | p value              | No record of test<br>or outside<br>window (N=616) | Received within<br>12mo window<br>(N=347) | p value            |
|----------------------------------------------|---------------------------------------------------|-------------------------------------------|----------------------|---------------------------------------------------|-------------------------------------------|--------------------|
| N-Miss                                       | 5                                                 | 3                                         |                      | 4                                                 | 4                                         |                    |
| Cervical cancer knowledge score (range: 0-5) |                                                   |                                           | 0.002 <sup>c</sup>   |                                                   |                                           | 0.003 <sup>c</sup> |
| Mean (SD)                                    | 2.8 (1.3)                                         | 3.1 (1.2)                                 |                      | 2.7 (1.3)                                         | 3.0 (1.2)                                 |                    |
| Median (Q1, Q3)                              | 3.0 (2.0, 4.0)                                    | 3.0 (2.0, 4.0)                            |                      | 3.0 (2.0, 4.0)                                    | 3.0 (2.0, 4.0)                            |                    |
| Range                                        | 0.0 - 5.0                                         | 0.0 - 5.0                                 |                      | 0.0 - 5.0                                         | 0.0 - 5.0                                 |                    |
| N-Miss                                       | 5                                                 | 3                                         |                      | 4                                                 | 4                                         |                    |
| CRC knowledge score (range: 0-5)             |                                                   |                                           | 0.001 <sup>c</sup>   |                                                   |                                           | 0.027 <sup>c</sup> |
| Mean (SD)                                    | 2.2 (1.3)                                         | 2.6 (1.4)                                 |                      | 2.2 (1.3)                                         | 2.4 (1.3)                                 |                    |
| Median (Q1, Q3)                              | 2.0 (1.0, 3.0)                                    | 3.0 (2.0, 4.0)                            |                      | 2.0 (1.0, 3.0)                                    | 2.0 (1.0, 3.0)                            |                    |
| Range                                        | 0.0 - 5.0                                         | 0.0 - 5.0                                 |                      | 0.0 - 5.0                                         | 0.0 - 5.0                                 |                    |
| N-Miss                                       | 5                                                 | 3                                         |                      | 4                                                 | 4                                         |                    |
| Knowledge score 1st principal component      |                                                   |                                           | < 0.001 <sup>c</sup> |                                                   |                                           | 0.008 <sup>c</sup> |
| Mean (SD)                                    | -0.1 (1.0)                                        | 0.3 (1.0)                                 |                      | -0.1 (1.0)                                        | 0.1 (1.0)                                 |                    |
| Median (Q1, Q3)                              | 0.1 (-0.6, 0.7)                                   | 0.4 (-0.3, 1.1)                           |                      | 0.1 (-0.6, 0.7)                                   | 0.1 (-0.6, 0.8)                           |                    |
| Range                                        | -3.1 - 2.1                                        | -3.1 - 2.1                                |                      | -3.1 - 2.1                                        | -3.1 - 2.1                                |                    |
| N-Miss                                       | 5                                                 | 3                                         |                      | 4                                                 | 4                                         |                    |

Note: percentages are row percentages; UTD = up to date.

<sup>a</sup>Two-sided Pearson's chi-squared test.

<sup>b</sup>Two-sided Fisher's exact test.

<sup>c</sup>Two-sided independent-groups t-test.

<sup>d</sup>For the 12% of participants whose medical record health care system location was not re-confirmed at 12 months, the location reported at their baseline interview was used to assess 12-month outcomes; only 5 persons had no medical record data or location confirmation at baseline or 12 months, and, among those 5, the 12-month self-report screening data was available and used for 4 persons in all analyses.

**eTable 2. Logistic Regression for All Cancer Screenings at 12 Months Postbaseline (n = 852): Sensitivity analysis for persons aged 66 or greater were coded to be UTD at baseline for cervical cancer screening.**

| Characteristic                                                                                   | OR <sup>a</sup> | 95% CI <sup>a</sup> | p-value |
|--------------------------------------------------------------------------------------------------|-----------------|---------------------|---------|
| <b>Study arm<sup>b</sup></b>                                                                     |                 |                     |         |
| Usual care                                                                                       | —               | —                   |         |
| DVD                                                                                              | 1.69            | 0.94, 3.15          | 0.090   |
| DVD/Navigator                                                                                    | 5.63            | 3.21, 10.3          | <0.001  |
| <b>Baseline screening status, not UTD for:</b>                                                   |                 |                     |         |
| Breast, colorectal and cervical                                                                  | —               | —                   |         |
| Breast and colorectal                                                                            | 1.58            | 0.64, 3.94          | 0.319   |
| Breast and cervical                                                                              | 2.30            | 0.84, 6.19          | 0.100   |
| Colorectal and cervical                                                                          | 0.99            | 0.36, 2.63          | 0.982   |
| Breast only                                                                                      | 14.9            | 6.45, 36.8          | <0.001  |
| Colorectal only                                                                                  | 4.59            | 2.33, 9.79          | <0.001  |
| Cervical only                                                                                    | 2.85            | 1.30, 6.56          | 0.010   |
| <b>Age</b>                                                                                       |                 |                     |         |
| 50-54                                                                                            | —               | —                   |         |
| 55-59                                                                                            | 0.94            | 0.57, 1.52          | 0.790   |
| 60-64                                                                                            | 0.85            | 0.50, 1.41          | 0.529   |
| 65+                                                                                              | 0.40            | 0.22, 0.72          | 0.003   |
| <b>Are you planning to have a mammogram, FOBT, colonoscopy or PAP test in the next 6 months?</b> |                 |                     |         |
| No                                                                                               | —               | —                   |         |
| Yes                                                                                              | 1.93            | 1.29, 2.94          | 0.002   |
| Perceived barriers 1st principal component                                                       | 1.23            | 0.99, 1.53          | 0.058   |
| Perceived cancer screening self-efficacy score (range: 4-20)                                     | 1.12            | 1.03, 1.22          | 0.009   |
| National percentile of block group ADI score                                                     | 0.99            | 0.98, 1.00          | 0.040   |

<sup>a</sup>OR = Odds Ratio, CI = two-sided 95% confidence interval.

<sup>b</sup>Effect of DVD/Navigator vs DVD: OR = 3.34; CI = 2.19, 5.08, p < 0.001.

Note: Re-confirmation of medical record location at 12 months was also adjusted for in this model (confirmed vs not confirmed at 12 months; OR = 4.76; CI = 2.22, 12.5; p < 0.001). UTD = up to date.

**eTable 3. Logistic Regression for Any Cancer Screening at 12 Months Postbaseline (n = 847): Sensitivity analysis for persons aged 66 or greater were coded to be UTD at baseline for cervical cancer screening.**

| Characteristic                                                                                   | OR <sup>a</sup> | 95% CI <sup>a</sup> | p-value |
|--------------------------------------------------------------------------------------------------|-----------------|---------------------|---------|
| <b>Study arm<sup>b</sup></b>                                                                     |                 |                     |         |
| Usual care                                                                                       | —               | —                   |         |
| DVD                                                                                              | 1.34            | 0.86, 2.09          | 0.198   |
| DVD/Navigator                                                                                    | 4.11            | 2.66, 6.46          | <0.001  |
| <b>Baseline screening status, not UTD for:</b>                                                   |                 |                     |         |
| Breast, colorectal and cervical                                                                  | —               | —                   |         |
| Breast and colorectal                                                                            | 1.18            | 0.66, 2.10          | 0.569   |
| Breast and cervical                                                                              | 1.58            | 0.79, 3.17          | 0.200   |
| Colorectal and cervical                                                                          | 0.91            | 0.50, 1.65          | 0.761   |
| Breast only                                                                                      | 1.54            | 0.78, 3.06          | 0.218   |
| Colorectal only                                                                                  | 0.50            | 0.30, 0.82          | 0.007   |
| Cervical only                                                                                    | 0.32            | 0.17, 0.60          | <0.001  |
| <b>Age</b>                                                                                       |                 |                     |         |
| 50-54                                                                                            | —               | —                   |         |
| 55-59                                                                                            | 1.17            | 0.77, 1.76          | 0.464   |
| 60-64                                                                                            | 1.05            | 0.67, 1.66          | 0.821   |
| 65+                                                                                              | 1.09            | 0.65, 1.83          | 0.742   |
| <b>How would you describe your household's financial situation right now?</b>                    |                 |                     |         |
| Has enough money for special things                                                              | —               | —                   |         |
| Can pay bills, but little extra money                                                            | 0.87            | 0.60, 1.24          | 0.434   |
| Has to cut back or has difficulty paying bills                                                   | 0.46            | 0.25, 0.83          | 0.012   |
| <b>Are you currently working for pay?</b>                                                        |                 |                     |         |
| No                                                                                               | —               | —                   |         |
| Yes - part time                                                                                  | 1.41            | 0.89, 2.23          | 0.149   |
| Yes - full time                                                                                  | 1.53            | 1.02, 2.29          | 0.039   |
| <b>Are you planning to have a mammogram, FOBT, colonoscopy or PAP test in the next 6 months?</b> |                 |                     |         |
| No                                                                                               | —               | —                   |         |
| Yes                                                                                              | 1.86            | 1.33, 2.62          | <0.001  |
| Perceived barriers 1st principal component                                                       | 1.27            | 1.06, 1.52          | 0.011   |
| Knowledge score 1st principal component                                                          | 1.19            | 1.00, 1.42          | 0.047   |
| Perceived cancer screening self-efficacy score (range: 4-20)                                     | 1.08            | 1.01, 1.15          | 0.030   |
| National percentile of block group ADI score                                                     | 0.99            | 0.98, 1.00          | 0.061   |

<sup>a</sup>OR = Odds Ratio, CI = two-sided 95% confidence interval.

<sup>b</sup>Effect of DVD/Navigator vs DVD: OR = 3.08; 95% CI = 2.16, 4.37, p < 0.001.

Note: confirmation of medical record location was also adjusted for in this model (confirmed vs not confirmed; OR = 4.55; CI = 2.63, 8.33; p < 0.001). UTD = up to date.

## **eAppendix. Intervention Cost Methods**

The cost of the interventions can be broken down into two sections: DVD only intervention and DVD plus PN intervention. The DVD-only intervention involves costs of the DVDs, personnel time cost for DVD production and distribution, and consultant costs for DVD production.

The DVD/PN intervention contains costs that were involved in the DVD intervention as well as costs of PN time.

All costs were converted to 2022-dollar values.

### DVD Costs:

Within the cost of the DVD, there were two main costs. The first was related to personnel time and the second was related to payments given to a third part consultant to assist in the production of the DVD.

### Personnel Time Costs:

The personnel costs associated with the implementation of the DVD intervention was determined by a detailed account of the operational costs of the intervention, excluding costs that were purely attributable to the research. Personnel contributed to the production and distribution of the DVD by assisting in the development, design, CAB meetings to revise, editing, packaging, and printing of the DVD. Average hours worked over the course of the two-year development were found retrospectively after the completion of the study to determine the cost of the DVD. This information along with salary and fringe benefits were used to calculate much of the cost of the DVD intervention. Finally, costs were updated to reflect 2022 dollars.

### Consultant Costs:

There a consultant was hired to assist with the production of the DVD. The service performed by the consultant was video production, including strategy, production, and post-production services. The total cost of the consultant was \$53,000. This cost along with personnel costs consist of the total cost of the DVD intervention. Finally, costs were updated to reflect 2022 dollars.

### DVD/PN Costs:

The costs of the DVD/PN intervention were the summation of the DVD costs and the PN costs and were broken down between the costs of the creation and dissemination of the DVD, which was described in the section above, and the costs of the patient navigators.

### PN Costs:

Time logs were used to track the broad categories of patient navigator time use, which were used to estimate costs for specific PN activities (e.g., arranging transportation). Navigators were assumed to have 10% effort in the first two years of the study. During this time, they prepared the navigation contact forms and the respective codebooks.

After the completion of the DVD, which finished in year 2 of the study, 100% PN effort was used to contact the participants to implement the DVD/PN intervention in years 3-5. Their base salary and fringe benefits were used to calculate the cost of the PN component of the DVD/PN intervention. Finally, costs were updated to reflect 2022 dollars.
