# Supplementary material for: Comparative Effectiveness of 2 Interventions to Increase Breast, Cervical, and Colorectal Cancer Screening Among Women in the Rural US: A Randomized Clinical Trial
Source: PubMed Central journal article supplement (PMC10148202; doi:10.1001/jamanetworkopen.2023.11004), 2023-04-28
Supplement: jamanetwopen-e2311004-s003.pdf [file jamanetwopen-e2311004-s003.pdf]

## Data Sharing Statement

Champion. Comparative Effectiveness of 2 Interventions to Increase Breast, Cervical, and Colorectal Cancer Screening Among Women in the Rural US. *JAMA Netw Open*. Published April 28, 2023. doi:10.1001/jamanetworkopen.2023.11004

### Data

**Data available:** Yes

**Data types:** Deidentified participant data

**How to access data:** Persons wanting access to data will need to contact authors.

**When available:** With publication

### Supporting Documents

**Document types:** None

### Additional Information

**Who can access the data:** Researchers whose proposal is approved.

**Types of analyses:** This will depend on the purpose of the analysis.

**Mechanisms of data availability:** After approval for proposal and signed access data agreement.
